# Supplementary material for: Of rice and men: Bill Kelley's next generation
Source: JCI journal article supplement (doi:10.1172/jci26871), 2005-10-01
Supplement: sd1 [file 1]

## **“KING OF THE KOBE(R)”**

(Sung to the tune of “King of the Road”)

Started out at Emory, Dallas made a memory  
Then for a research start he figured out HGPRT  
Then off to Boston, Mass, where all but Alex noted his class  
He was marked for something special, King of the Kobe(r)!

Then Duke and then Go Blue, and he rounded up quite a crew  
A recruiter without peer (I’m just a little bit partial here)  
And then after those 14 years, it was time for Bill to change his gears  
He made Penn the med-ultimate, King of the Kobe(r)!

Bridge:

When Bill Kelley went on student rounds  
Not a dry seat could be found  
He was telling them that “knowledge heals”  
But they called it “clubbing the baby seals”

He just meant to teach them right, he was a role model day and night  
In the lab, on the ward, at home – was that all Bill or does he have a clone?  
So a lot of us that are here today learned from Bill to find our way  
He was skating where the puck was gonna be, King of the Kobe(r)!

We know Bill gets his spark from Paige, Ginger, Lori, Mark  
And Lois, we’re all her fans, superwoman for a superman  
So let us all now agree that a medical giant is he  
He’s our Man of the Year – that’s Bill – King of the Kobe(r)!

***Performed by Francis S. Collins for the presentation of the 2005 Association of American Physicians Kober Medal.***
